# Supplementary material for: Quinovic Acid Impedes Cholesterol Dyshomeostasis, Oxidative Stress, and Neurodegeneration in an Amyloid-β-Induced Mouse Model
Source: Hindawi journal article supplement (doi:10.1155/2020/9523758), 2020-11-20
Supplement: f1 [file 9523758.f1.docx]

**a**

**b**

**Figure S1**. Quinovic acid protects against oligomeric Aβ (1-42)-induced neurotoxicity in SH-SY5Y neuroblastoma cells. a) MTT assay of QA against cell viability in SH-SY5Y cells. Cultures were treated without (control) or with QA different concentrations range (5-115 μM) for 24 h to measure cell viability. Vehicle control cells were treated with 0.2% DMSO. b) MTT assay of QA against AβO-induced toxicity in SH-SY5Y cells. Cells were treated either with Aβ (5 μM) or co-treated with QA different concentration (1-115 μM). Control (Ctl) cells were grown in maintenance media only. Data are presented as mean ± SEM. *P < 0.05 compared with the control cells. #P < 0.05 compared with the AβO-cells and n.s represents no significant change. Abbreviations: AβO; Amyloid-beta (1-42) oligomer; QA; Quinovic acid
